# Supplementary material for: A pan-cancer analysis of secreted Frizzled-related proteins: re-examining their proposed tumour suppressive function
Source: PubMed Central journal article supplement (PMC5316967; doi:10.1038/srep42719), 2017-02-20
Supplement: srep42719-s1.pdf [file srep42719-s1.pdf]

# **A pan-cancer analysis of secreted Frizzled-related proteins: re-examining their proposed tumour suppressive function**

**Krista Marie Vincent<sup>1,2</sup>, and Lynne-Marie Postovit<sup>1,\*</sup>**

<sup>1</sup>Department of Oncology, Faculty of Medicine and Dentistry, University of Alberta, 114th St and 87th Ave, Edmonton, AB, Canada, T6G 2E1

<sup>2</sup>Department of Anatomy and Cell Biology, Faculty of Medicine and Dentistry, University of Western Ontario, 1151 Richmond St, London, ON, Canada, N6A 3K7

[\\*postovit@ualberta.ca](mailto:postovit@ualberta.ca)

## **SUPPLEMENTAL INFORMATION**

## SUPPLEMENTARY FIGURE LEGENDS

**Supplementary Figure 1. Summary of patient survival information for 15 different cancers from the TCGA.** Kaplan-Meier depiction of overall survival for the various cancer dataset used. Barplot depicts 5 year survival rate +/- 95% confidence interval.

**Supplementary Figure 2. Survival analysis of multiple cancers based on *SFRP* expression.** Kaplan-Meier depictions of 5 year overall survival stratified by *SFRP* expression (high expression: red, low expression: blue) in fifteen types of cancer. Patients were dichotomized by ROC curve. Significance was determined by log-rank test and associated p values are displayed in the lower right corners of each plot.

**Supplementary Figure 3. Re-sampling analysis of the association of *SFRP* expression with patient survival across different cancer types.** Hazard ratios for *SFRP* expression on overall survival were conducted on 70% of the dataset and re-sampled 500 times. Hazard ratios of each *SFRP* across different cancer types were plotted on violin plots.

**Supplementary Figure 4. Association of *SFRP* expression with copy number status in breast cancer.** Boxplot depicts (a) *SFRP1*, (b) *SFRP2*, (c) *SFRP3*, (d) *SFRP4*, and (e) *SFRP5* expression values ( $\log_2[\text{RSEM normalized values} + 1]$ ) against putative *SFRP* copy number status (GISTIC) for breast cancer patients. Significance was determined by one-way ANOVA followed by Tukey's HSD. Boxplots sharing the same letter are not significantly different according to Tukey's HSD test ( $p > 0.05$ ).

**Supplementary Figure 5. Single cell analysis of *SFRP2* and *SFRP4* expression in breast cancer.** Barplot depicts (a) Stromal and (b) Immune Scores of individual cells from tumour BC02. Cells were identified as stromal or immune if they were  $>1.75$  standard deviations above mean levels. (c) *SFRP2* and (d) *SFRP4* expression values (transcripts per million, TPM) were summarized based on cell type. Bars depict mean expression values.

**Supplementary Figure 6. Correlation matrix of *SFRPs* to each other in fifteen types of cancer.** Correlation matrix of the expression levels of different *SFRP* family members ( $\log_2[\text{RSEM normalized values} + 1]$ ) in primary tumours from multiple cancers. Positive correlations are displayed in blue and negative correlations in red. Colour intensity and size of the circle are proportional to the correlation coefficients. Pearson's correlation coefficients are identified in the corresponding lower left corners. Correlations that are crossed out are not significant ( $p > 0.05$ ).

**Supplementary Figure 7. Correlation matrix of *SFRPs* to indicated gene sets in fifteen types of cancer.** Correlation matrix of the expression levels of different *SFRP* family members ( $\log_2[\text{RSEM normalized values} + 1]$ ) in primary tumours to indicated gene set enrichment. Positive correlations are displayed in blue and negative correlations in red. Colour intensity and size of the circle are proportional to the correlation coefficients.

**Supplementary Table 1. Summary statistics of *SFRP* expression in primary tumours for the 29 tumour types used in this study.**

**Supplementary Table 2. Summary statistics of *SFRP* expression in normal tissues for the 29 tumour types used in this study.**

Supplemental Figure 1

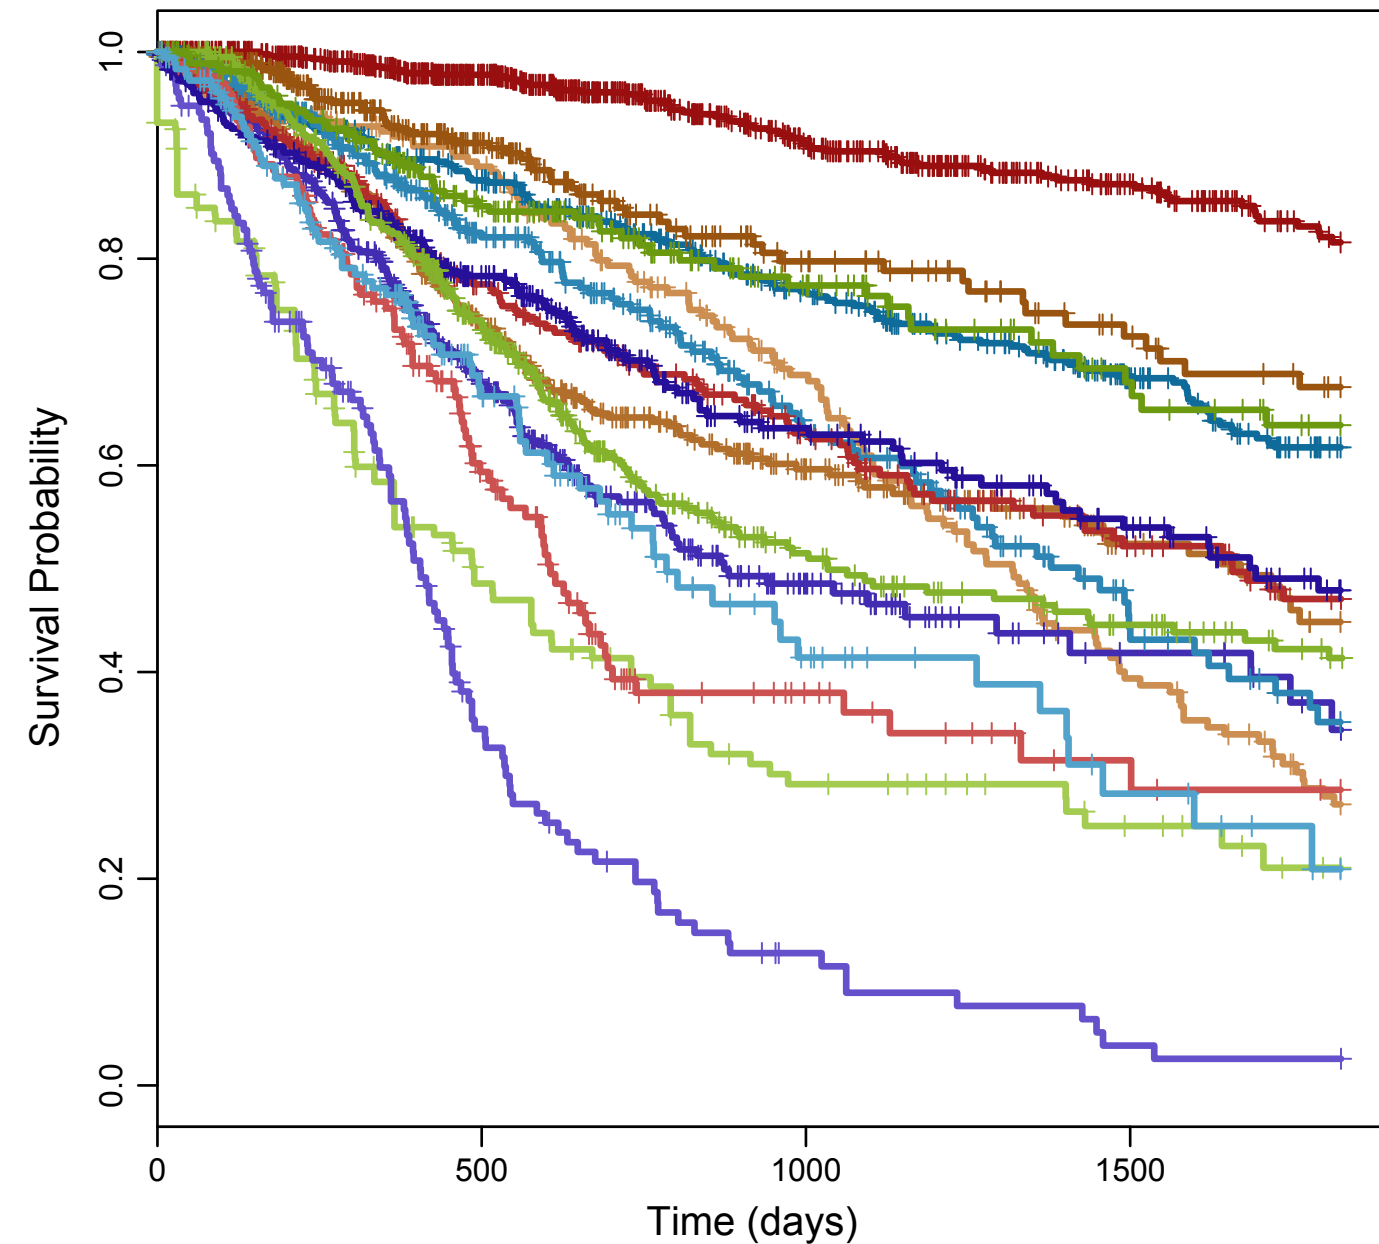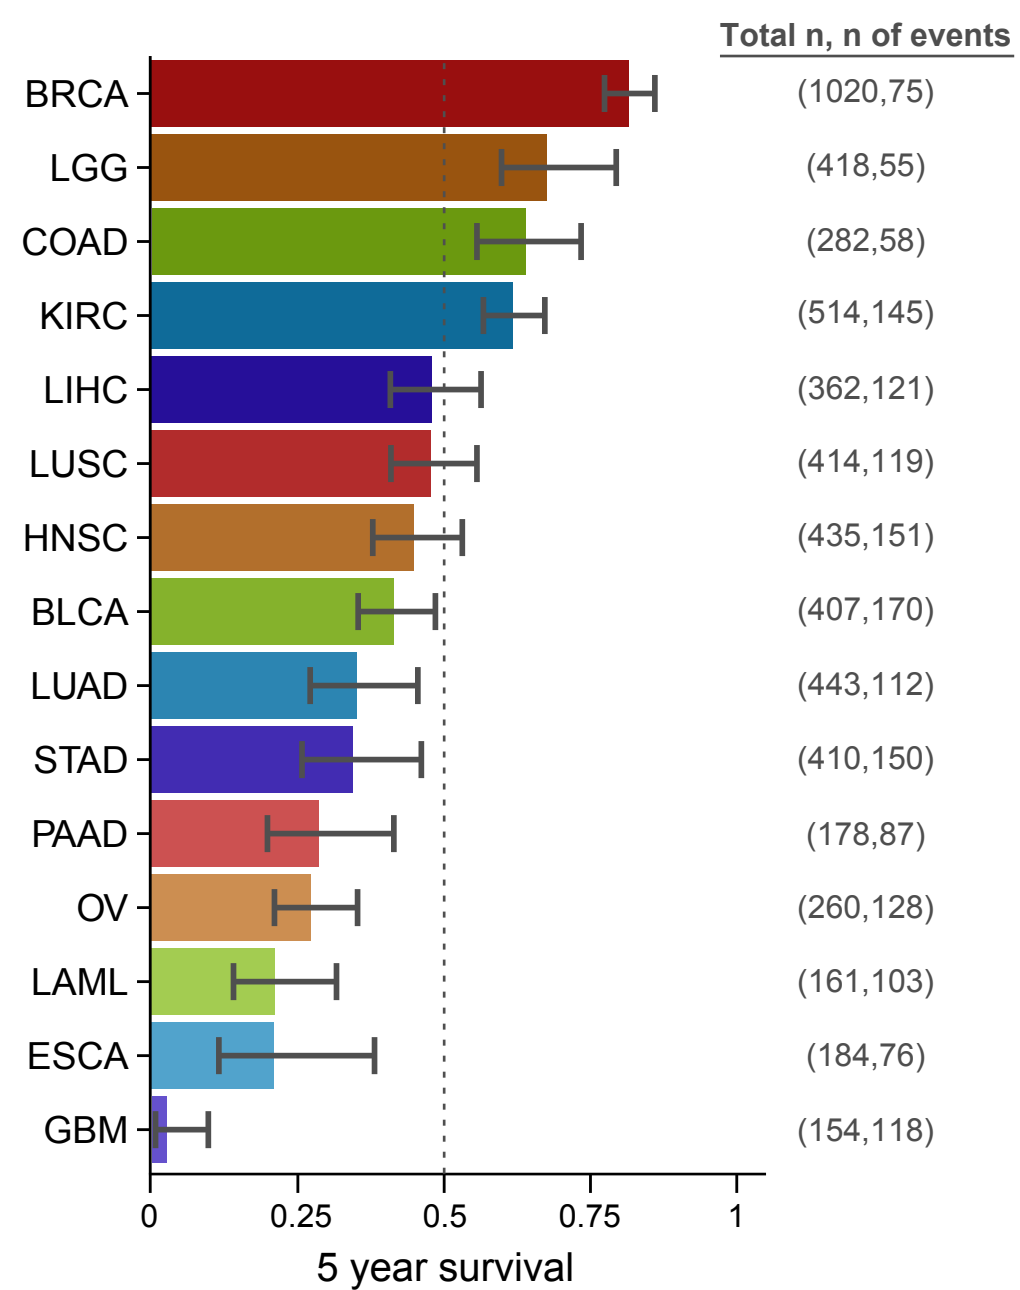

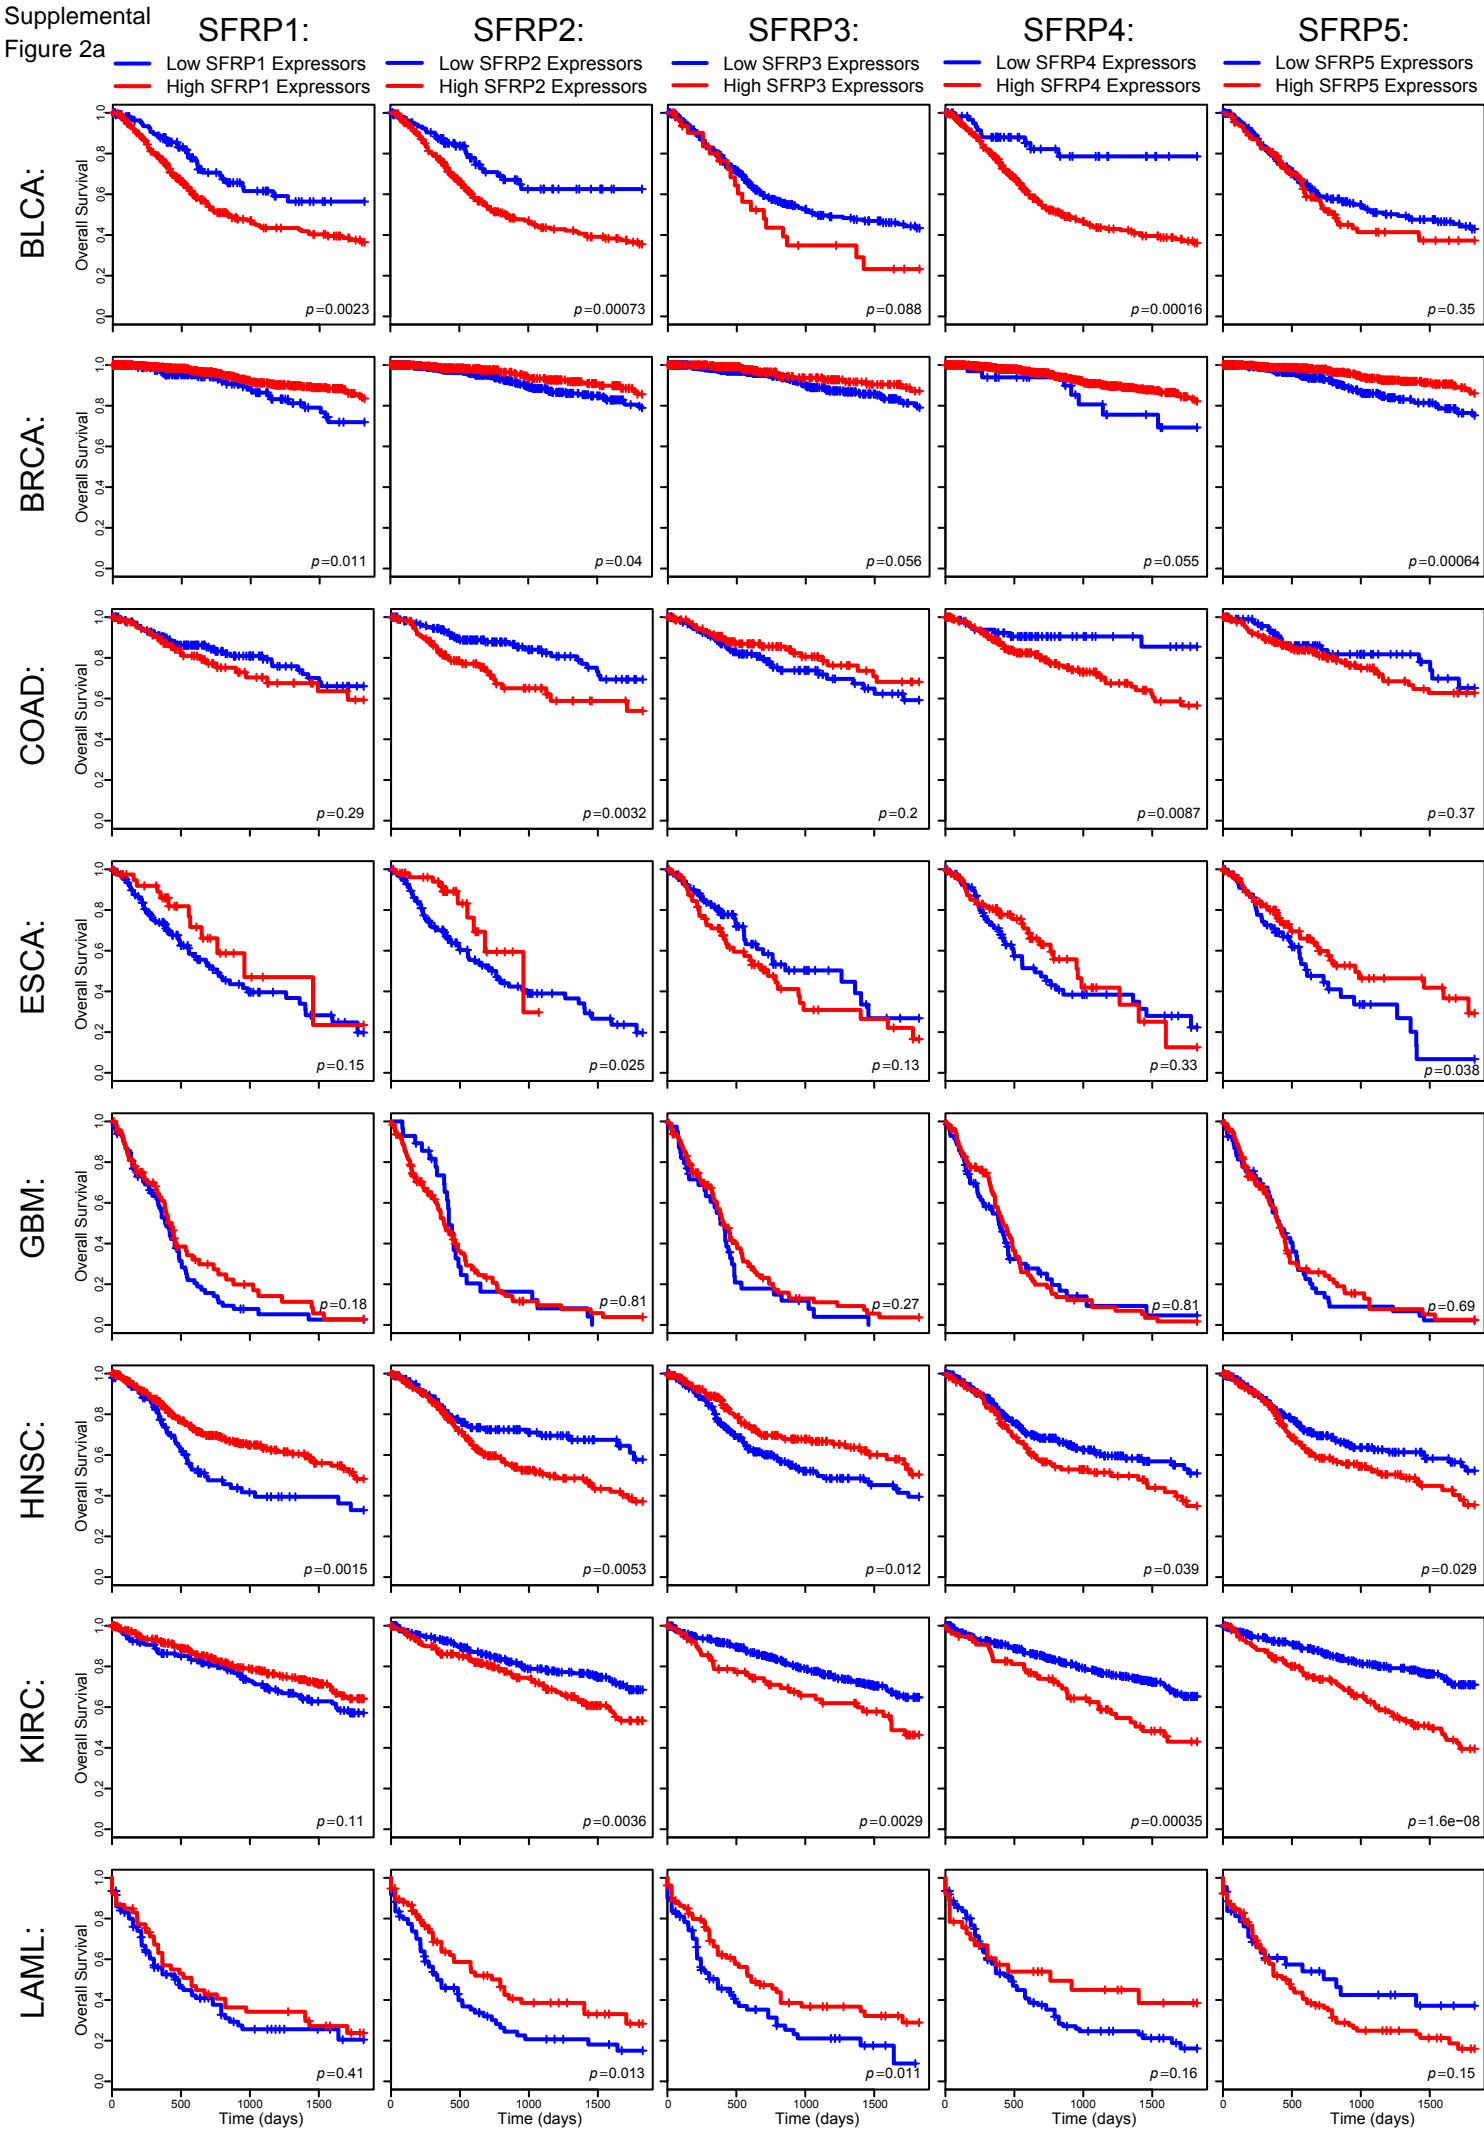

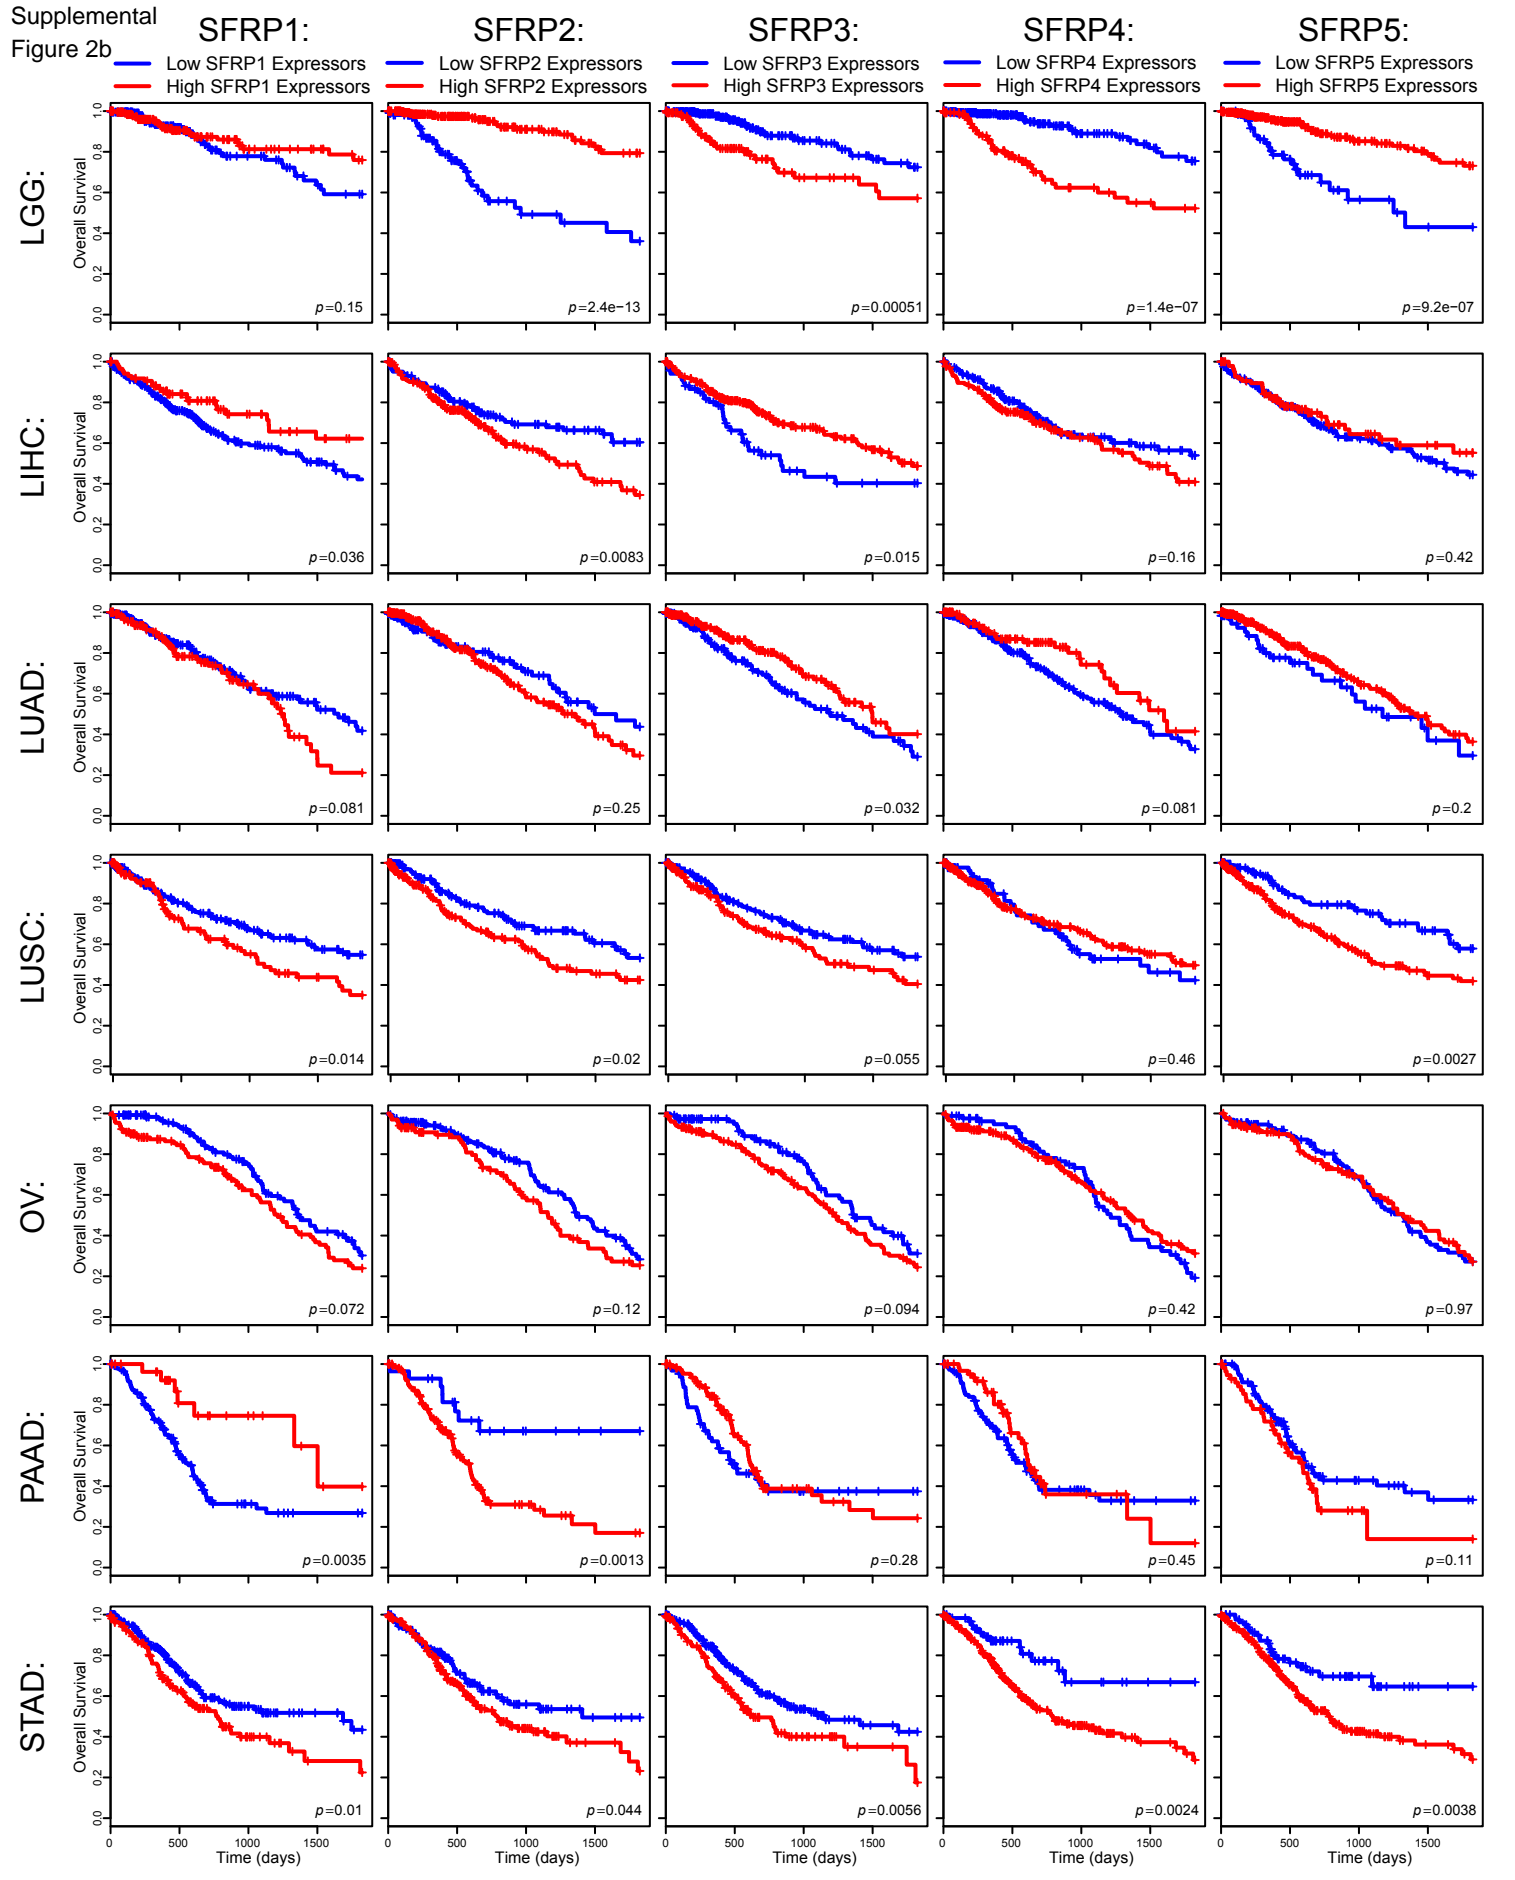

Supplemental Figure 3 **BLCA**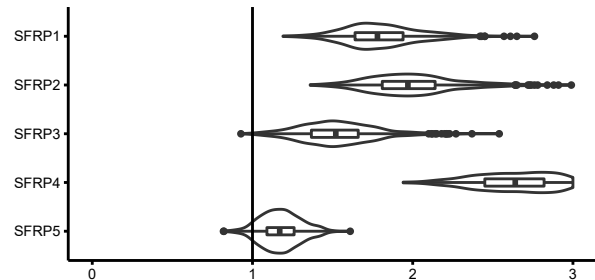**GBM**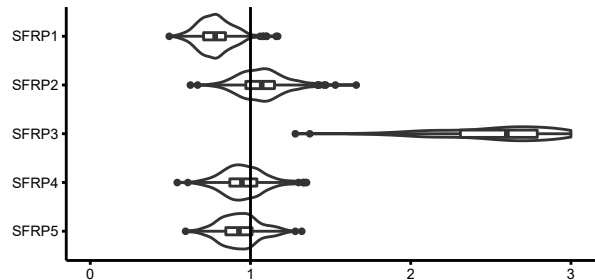**HNSC**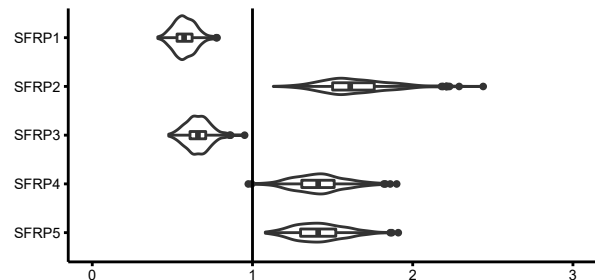**KIRC**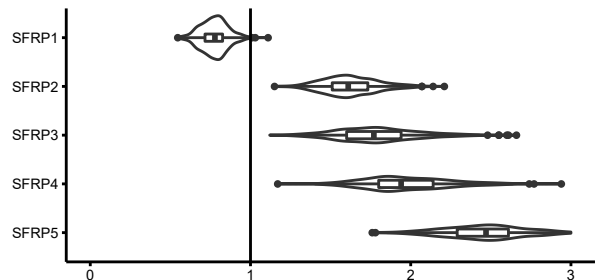**LAML**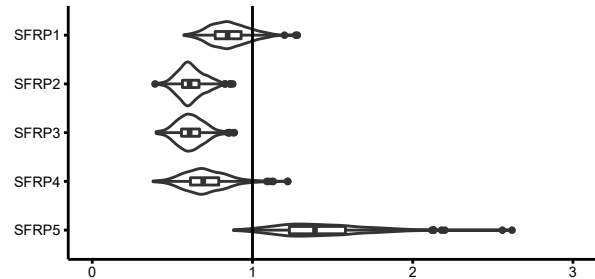**LIHC**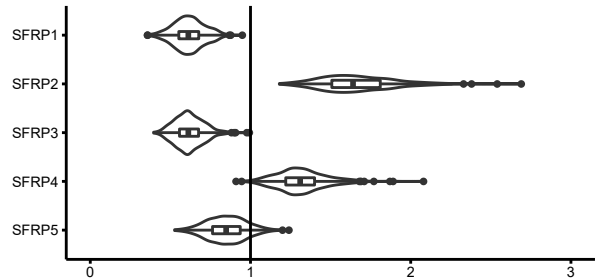**LUAD**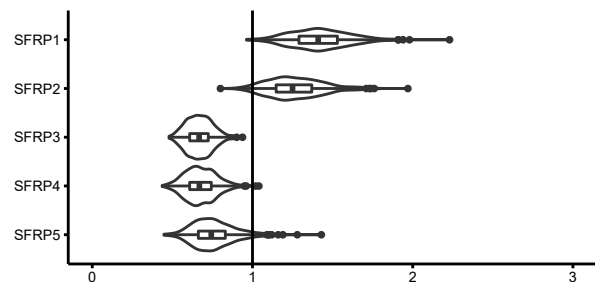**LUSC**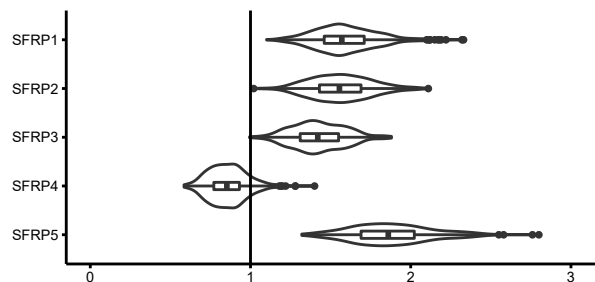**OV**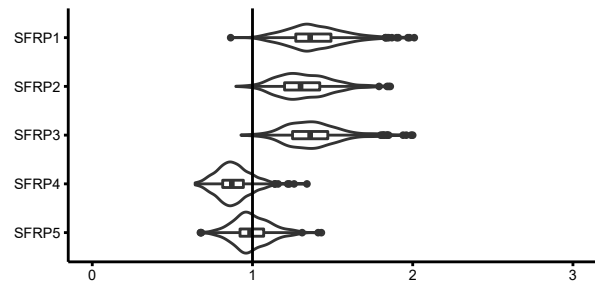**STAD**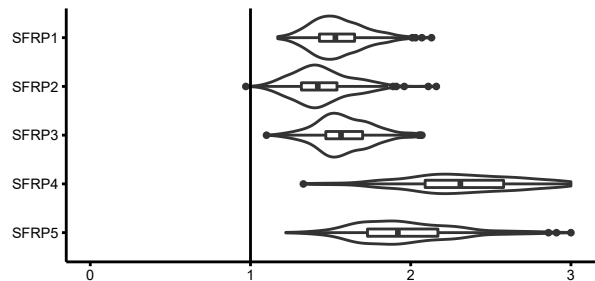

Hazard Ratio

Hazard Ratio

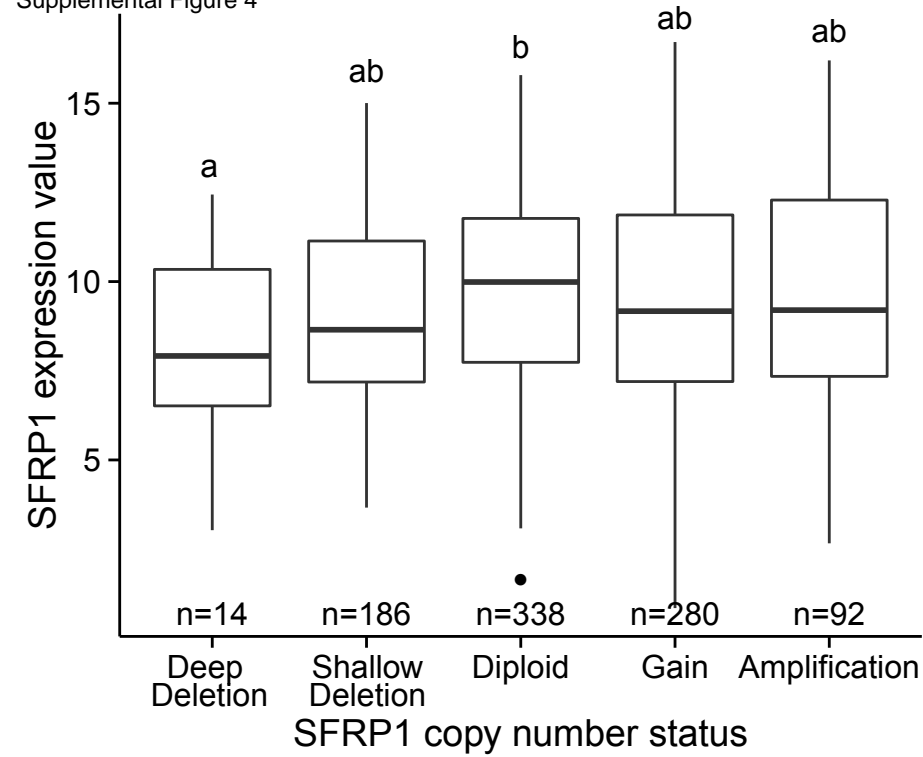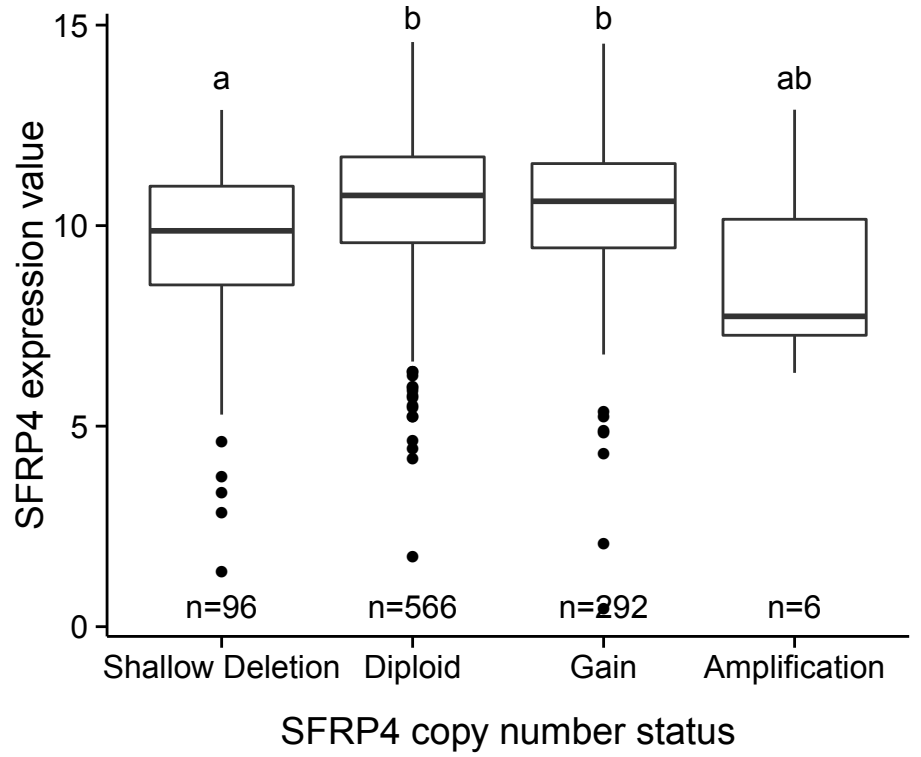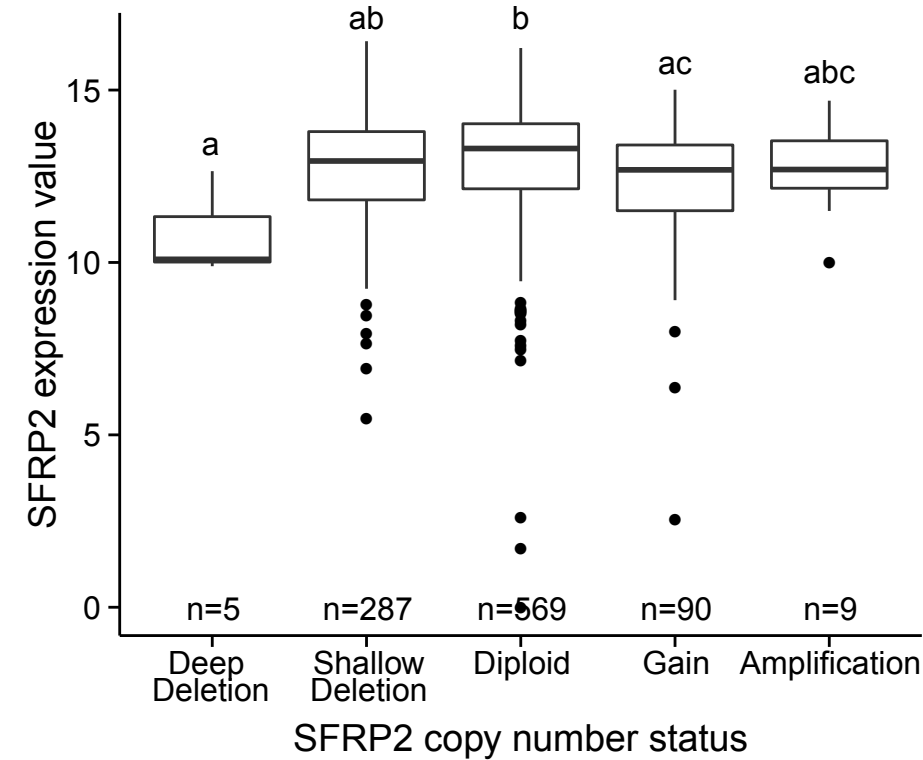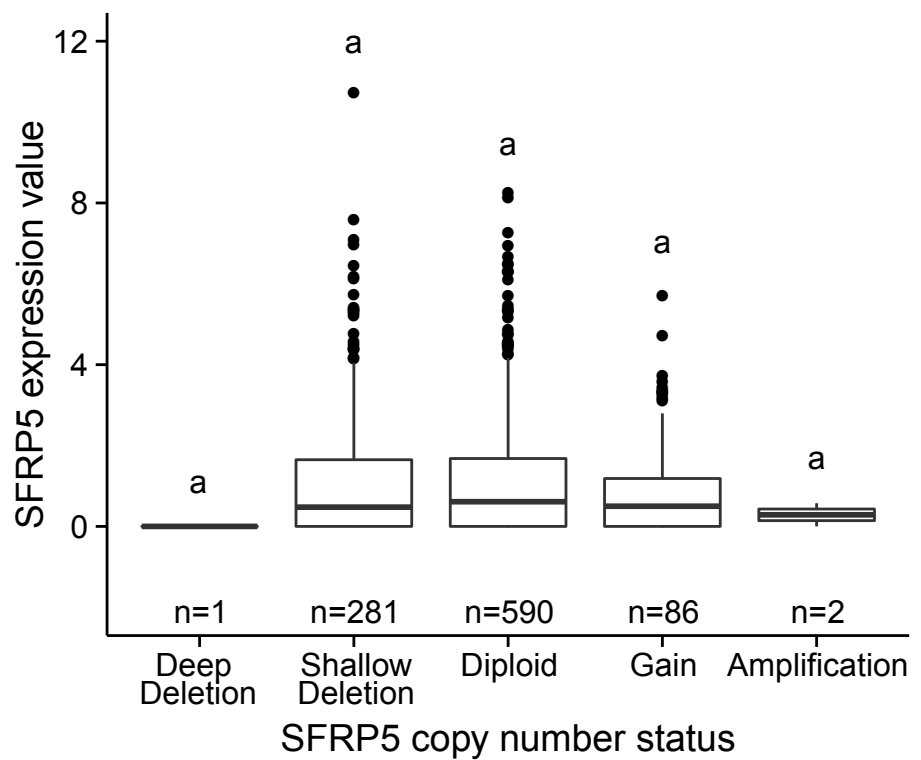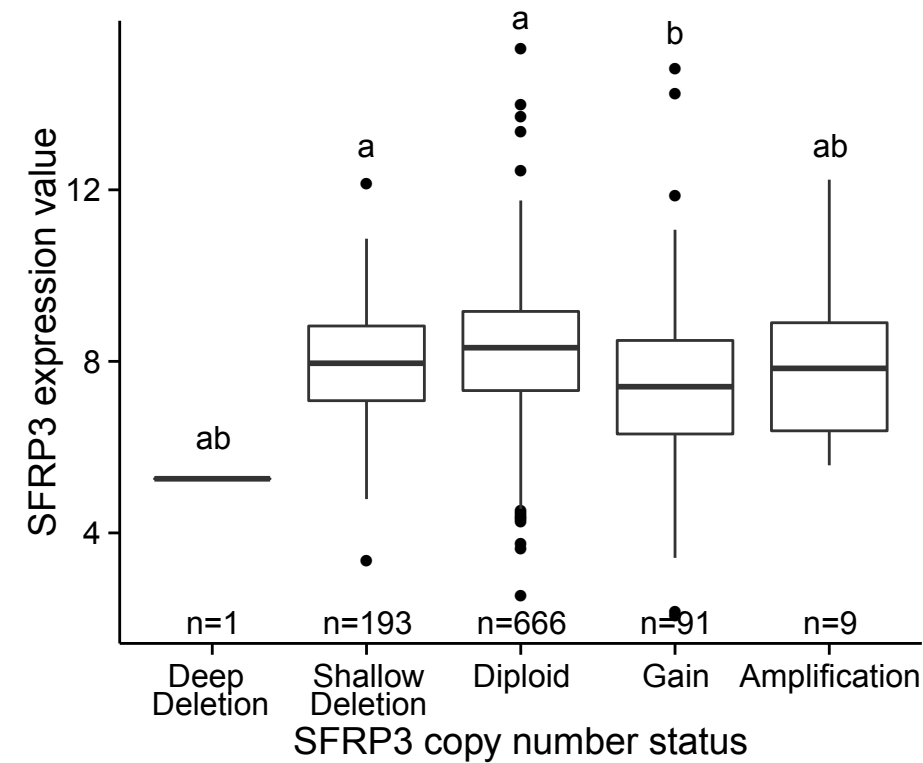



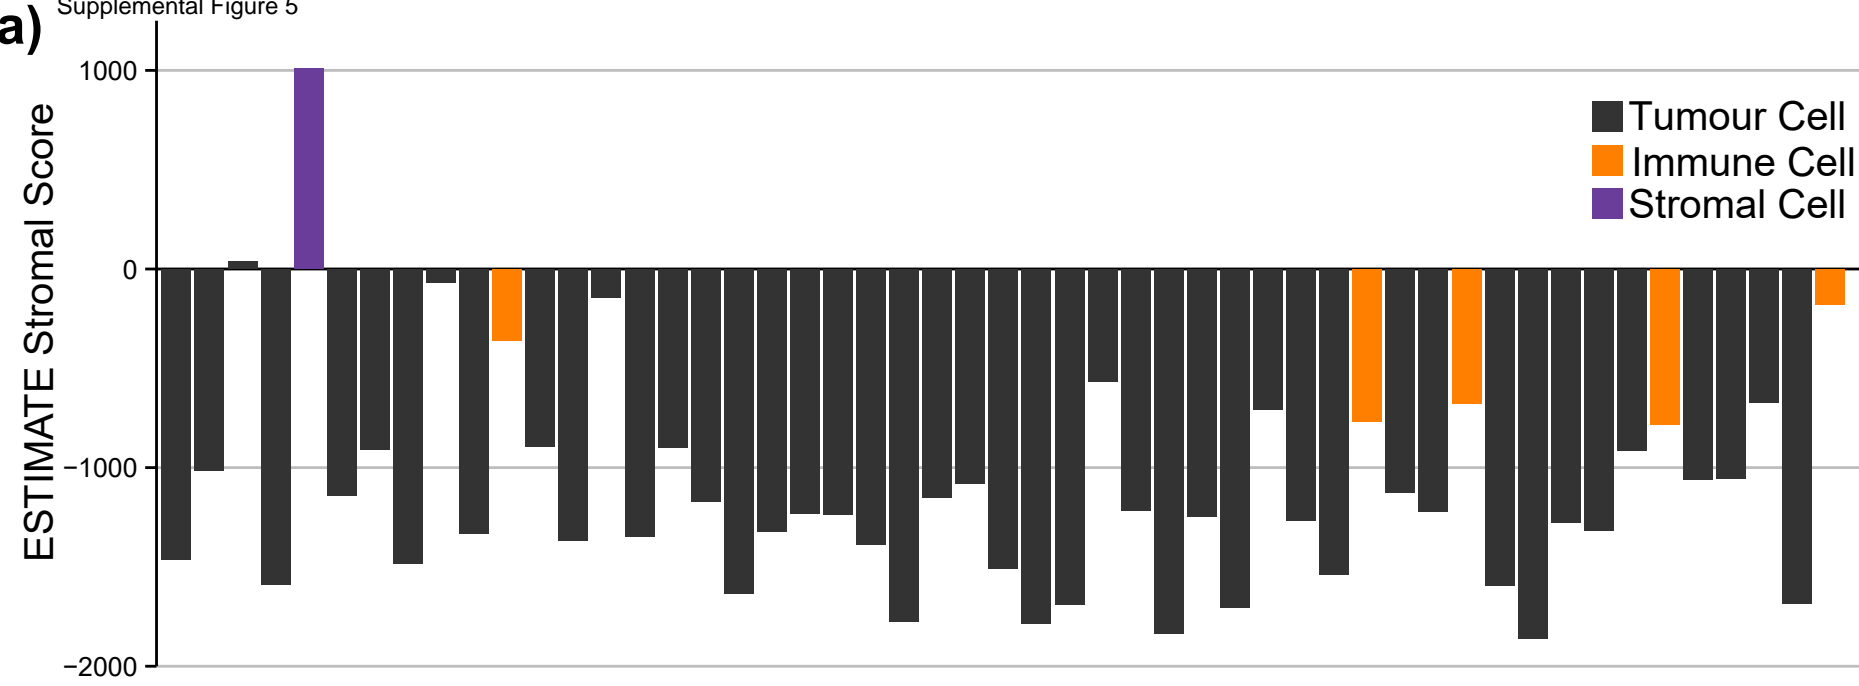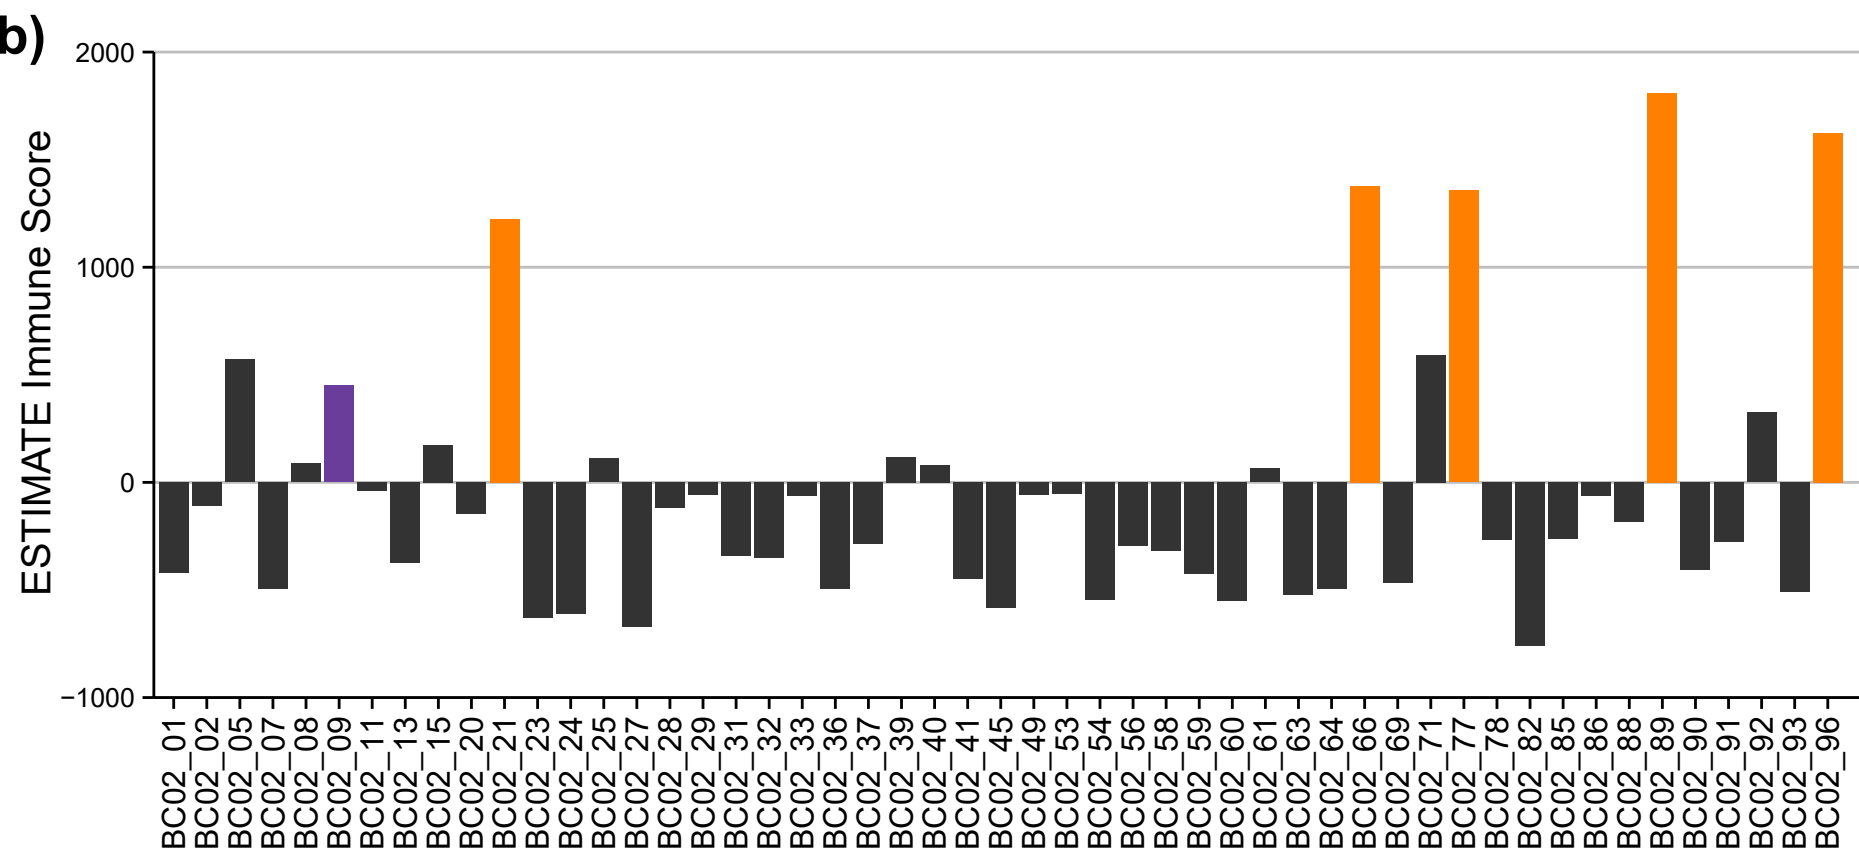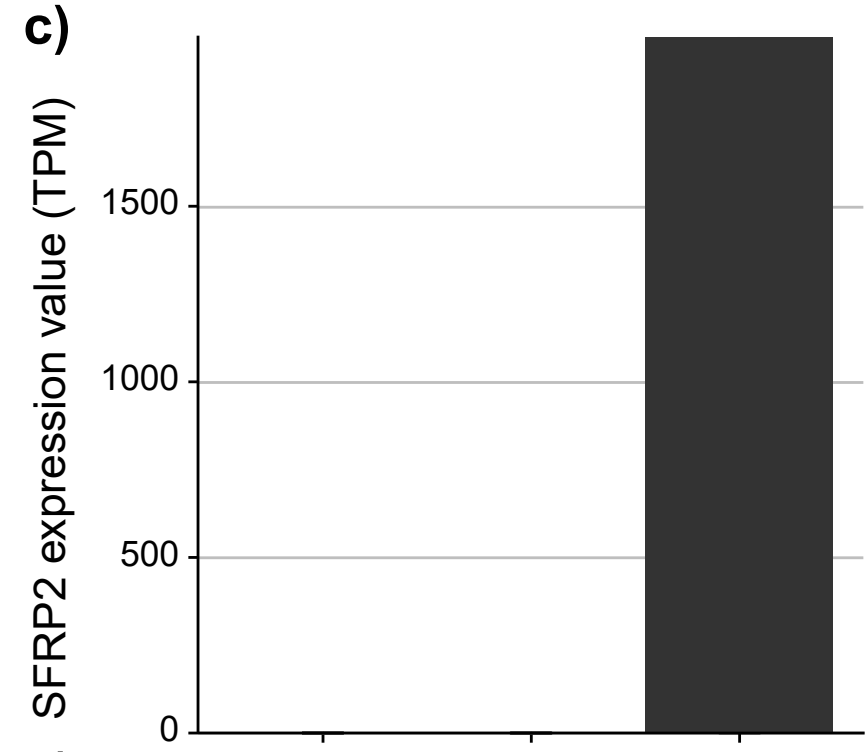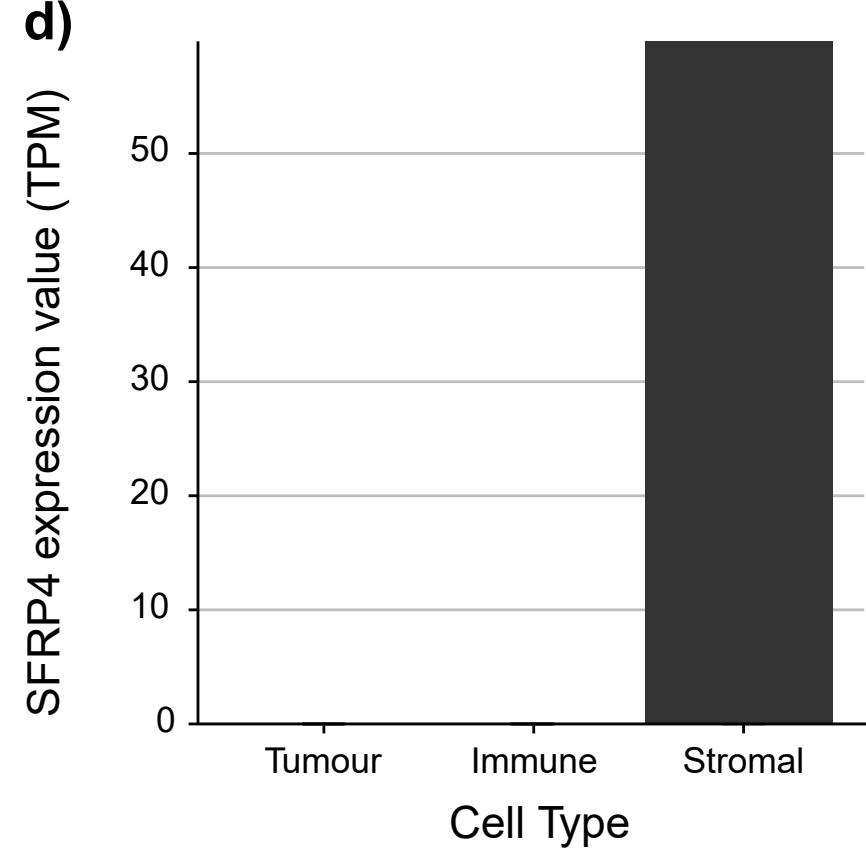

Supplemental **BLCA**

Figure 6

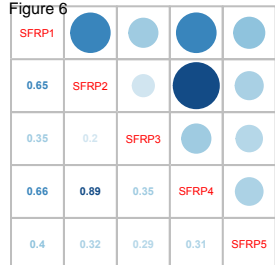**BRCA**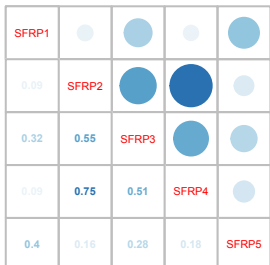**COAD**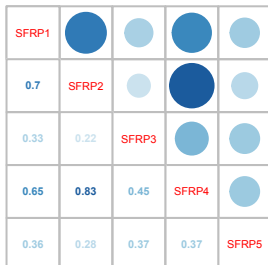**ESCA**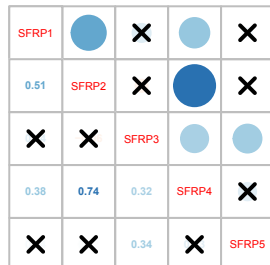**GBM**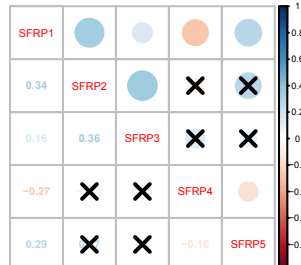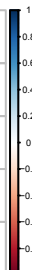**HNSC**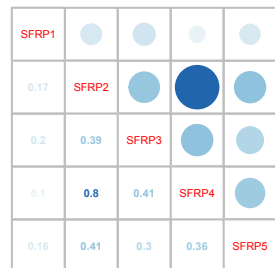**KIRC**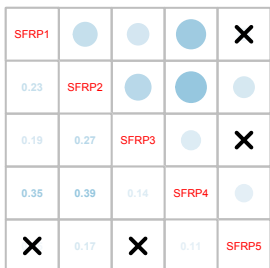**LAML**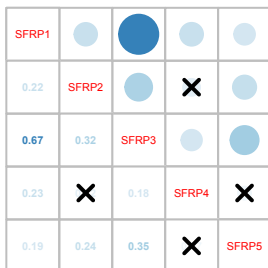**LGG**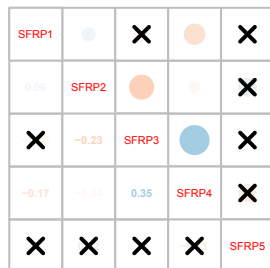**LIHC**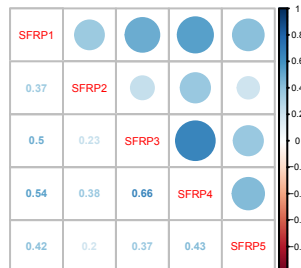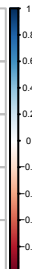**LUAD**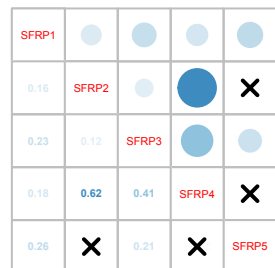**LUSC**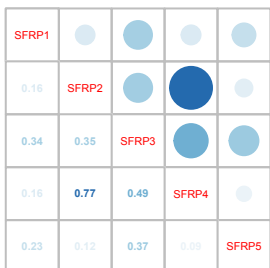**OV**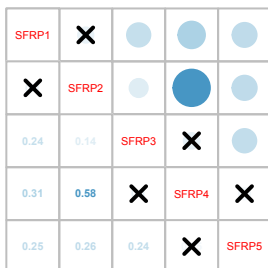**PAAD**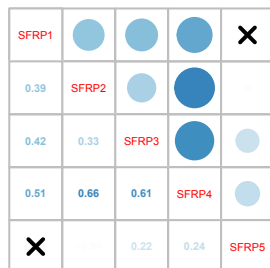**STAD**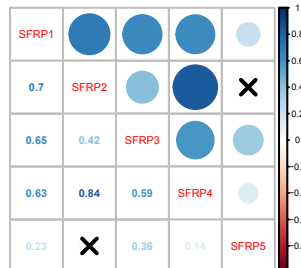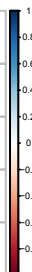

Supplemental Figure 7

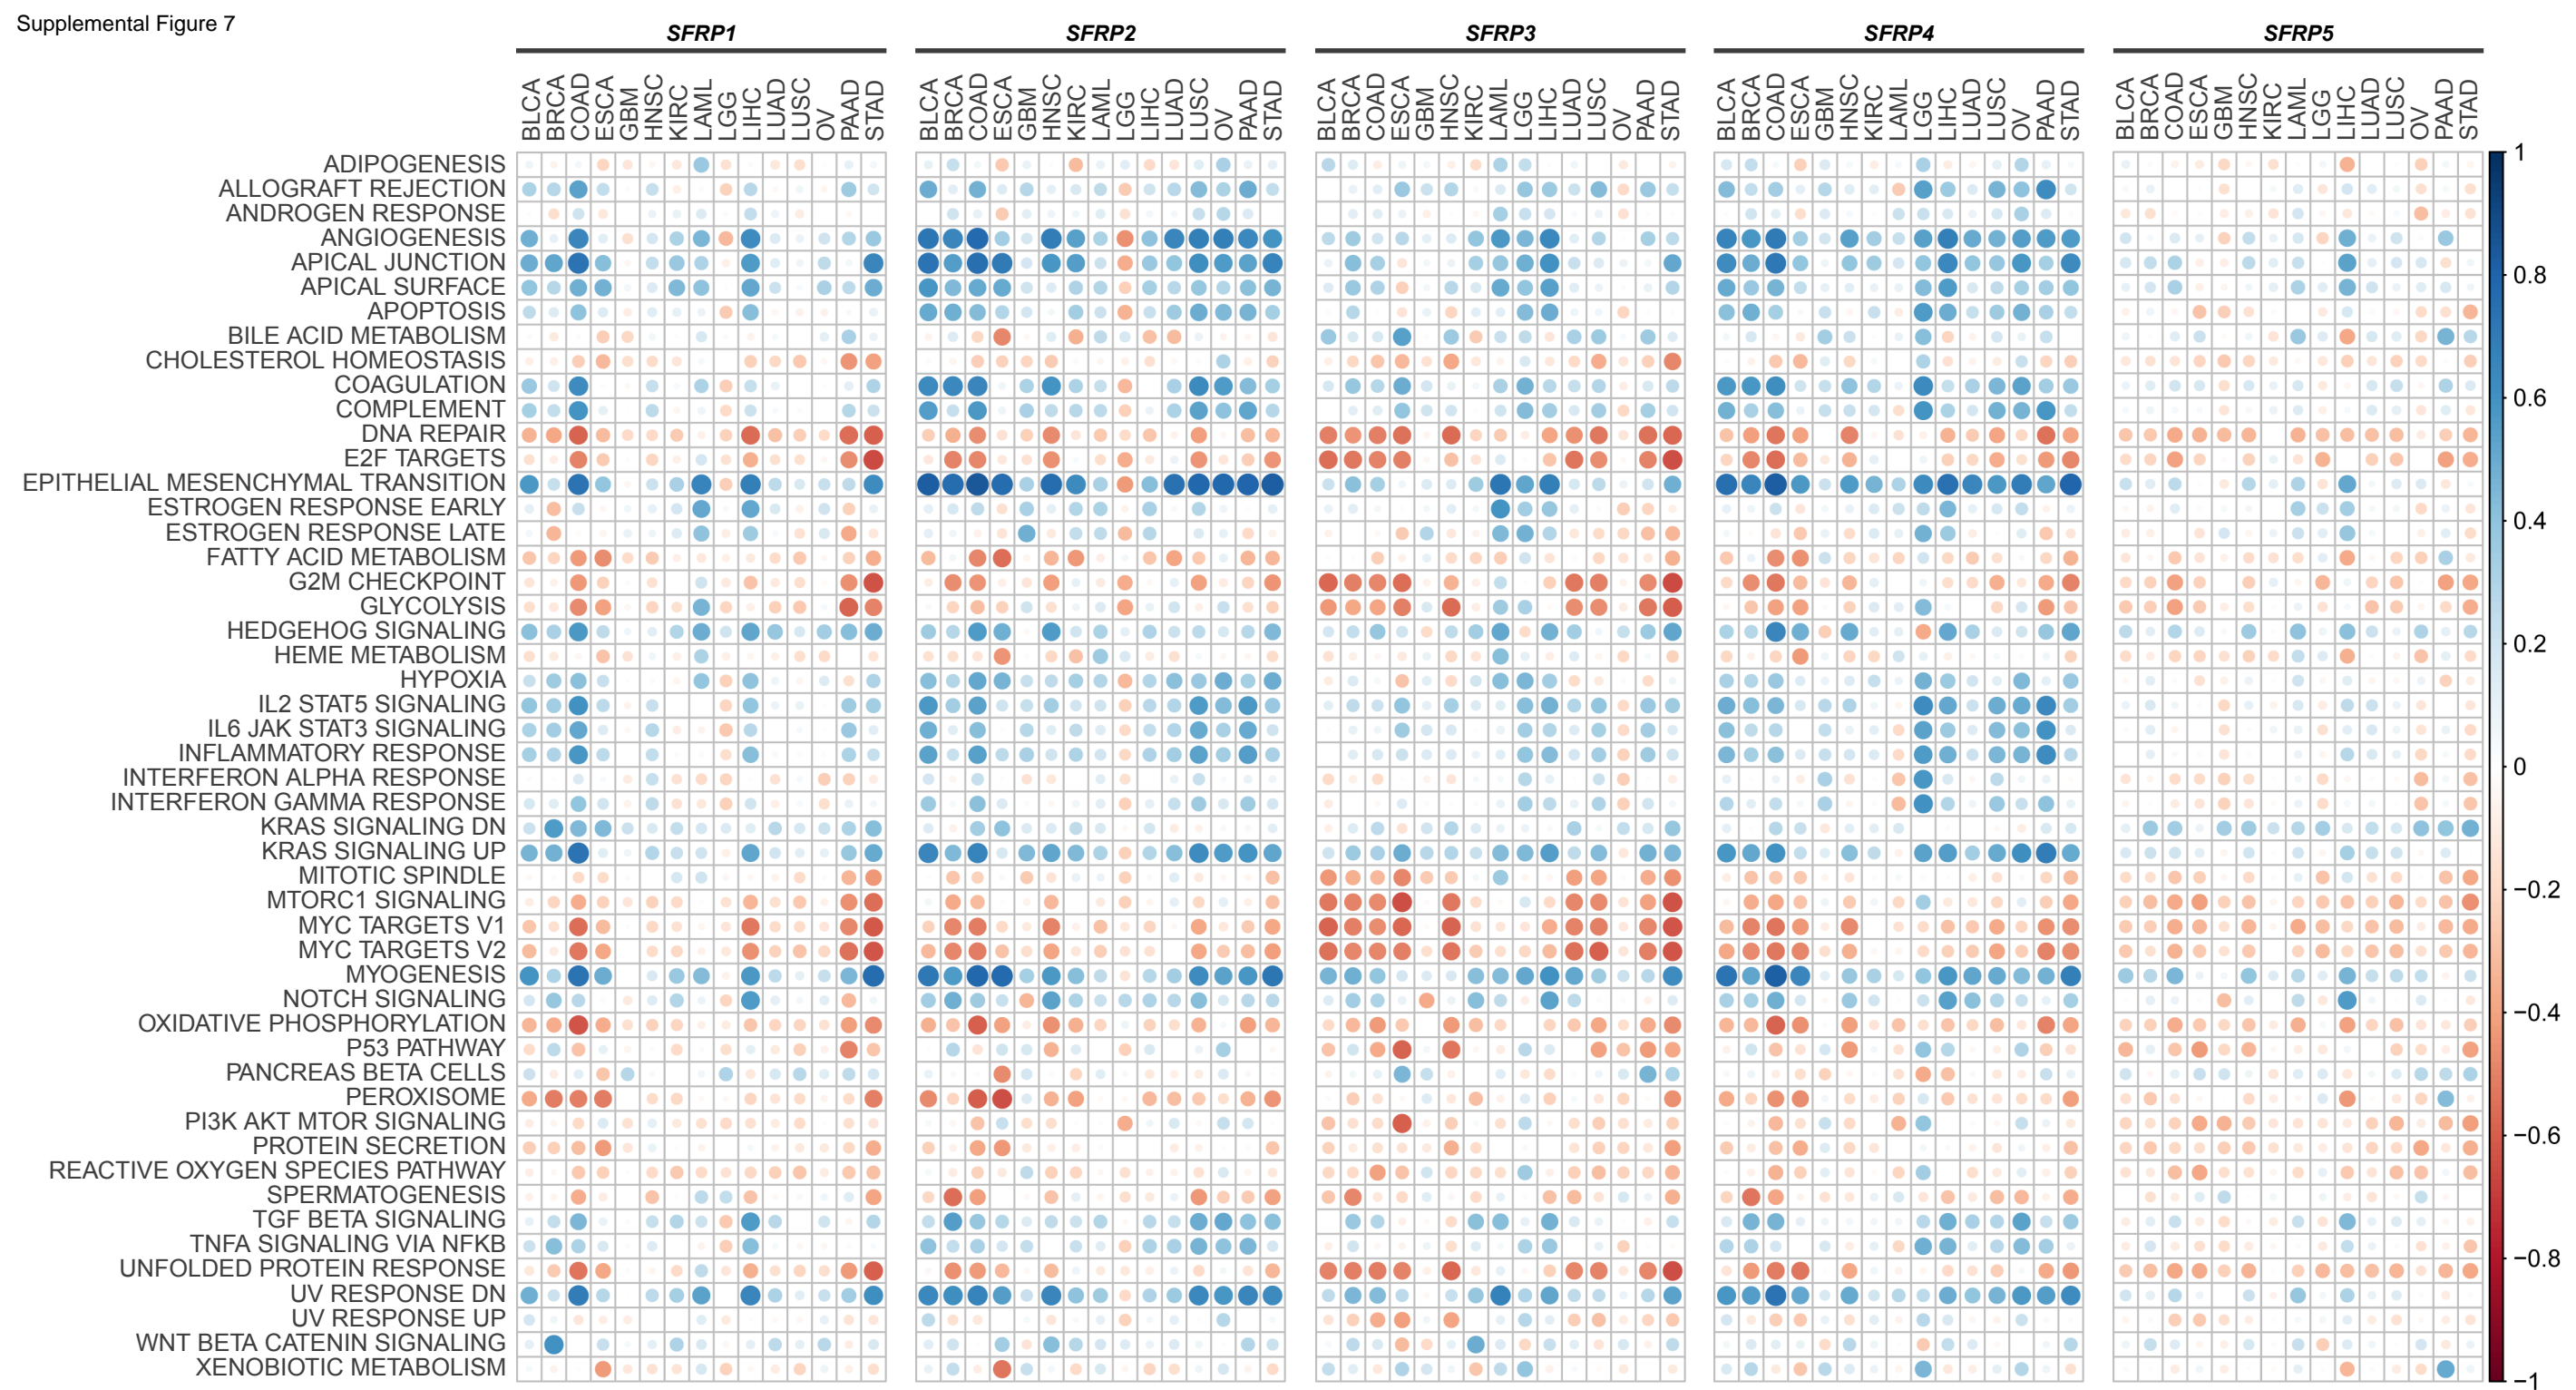

**Supplemental Table 1. Summary statistics of SFRP expression in primary tumours for the 29 tumour types used in this study.**

| Tumour Type                                                               | TCGA ID | n    | Expression data   |         |               |          |                  |         |                  |         |             |          |
|---------------------------------------------------------------------------|---------|------|-------------------|---------|---------------|----------|------------------|---------|------------------|---------|-------------|----------|
|                                                                           |         |      | SFRP1             |         | SFRP2         |          | SFRP3            |         | SFRP4            |         | SFRP5       |          |
|                                                                           |         |      | Range             | Median  | Range         | Median   | Range            | Median  | Range            | Median  | Range       | Median   |
| Adrenocortical carcinoma                                                  | ACC     | 79   | 0.00584-60.90331  | 1.57944 | 0-20.195543   | 0.038278 | 0.01855-4.84615  | 0.44737 | 0-8.96342        | 0.08537 | 0-11.77111  | 0        |
| Bladder urothelial carcinoma                                              | BLCA    | 310  | 1-24.83405        | 0.22133 | 0-189.10664   | 1.95221  | 0.003941-17.4223 | 0.49892 | 0-223.84745      | 0.77636 | 0-1.153605  | 0.001302 |
| Breast invasive carcinoma                                                 | BRCA    | 1062 | 0.0028-398.3573   | 2.8125  | 0-370.36      | 33.58    | 0.00649-145.1939 | 1.09666 | 0.00161-180.4253 | 5.82701 | 0-7.110569  | 0.001685 |
| Cervical squamous cell carcinoma and endocervical squamous cell carcinoma | CESC    | 253  | 0.00077-65.14137  | 1.59202 | 0.00195-153.3 | 1.54257  | 0.00541-50.23005 | 0.26316 | 0-155.2068       | 1.3742  | 0-0.6299401 | 0.000821 |
| Colon adenocarcinoma                                                      | COAD    | 273  | 0-9.60983         | 0.04798 | 0-87.2538     | 1.6535   | 0.009901-27.7958 | 0.65581 | 0.00314-64.31333 | 1.58837 | 0-4.607973  | 0.003533 |
| Lymphoid neoplasm diffuse large B-cell lymphoma                           | DLBC    | 43   | 0.002635-0.39665  | 0.0347  | 0.00056-7.621 | 0.17682  | 0.01186-2.38689  | 0.31162 | 0-7.5739         | 0.2585  | 0-0.0414847 | 0.000993 |
| Esophageal carcinoma                                                      | ESCA    | 125  | 0.00141-22.42087  | 0.10971 | 0.00074-61.61 | 2.438    | 0.01518-4.17078  | 0.18529 | 0-18.30090       | 0.40229 | 0-1.529435  | 0.010036 |
| Glioblastoma multiforme                                                   | GBM     | 156  | 0.00420-70.13783  | 0.32895 | 0.00361-22.31 | 0.19706  | 0.03043-28.11672 | 1.59096 | 0.09075-69.53368 | 2.00423 | 0-19.977529 | 0.008578 |
| Head and neck squamous cell carcinoma                                     | HNSC    | 497  | 0.01184-43.86487  | 1.22222 | 0.03571-205.5 | 6.375    | 0.005703-3.72693 | 0.14067 | 0.00132-140.5010 | 0.70247 | 0-4.846954  | 0.004073 |
| Kidney chromophobe                                                        | KICH    | 66   | 0.00294-72.24735  | 0.15947 | 0.001089-20.1 | 0.839002 | 0.07941-3.03265  | 0.55491 | 0-14.18824       | 0.2155  | 0-0.811344  | 0        |
| Kidney renal clear carcinoma                                              | KIRC    | 531  | 0.00432-92.40907  | 0.29238 | 0-127.0790    | 1.0428   | 0.1317-331.6563  | 6.7594  | 0.00319-92.47894 | 0.75227 | 0-2.256757  | 0.001335 |
| Kidney renal papillary cell carcinoma                                     | KIRP    | 241  | 0-25.14800        | 0.13088 | 0-22.90029    | 0.09647  | 0.00885-74.39822 | 0.48062 | 0-25.2253        | 0.4153  | 0-1.006944  | 0        |
| Acute myeloid leukemia                                                    | LAML    | 173  | 0-0.858187        | 0.00453 | 0-0.093458    | 0.002392 | 0-2.117284       | 0.00649 | 0-0.444860       | 0.02032 | 0-1.24561   | 0.02143  |
| Brain lower grade glioma                                                  | LGG     | 513  | 0.002219-20.74505 | 0.62651 | 0.00453-123.3 | 3.73628  | 0.09541-27.02295 | 0.61158 | 0.01057-34.05186 | 0.36682 | 0-66.76755  | 0.01968  |
| Liver hepatocellular carcinoma                                            | LIHC    | 268  | 0-8.45124         | 0.05707 | 0-11.89032    | 0.01023  | 0.0533-36.2656   | 0.7797  | 0-47.9025        | 0.2472  | 0-120.43881 | 0.01307  |
| Lung adenocarcinoma                                                       | LUAD    | 488  | 0-65.75837        | 0.15199 | 0.04023-199.1 | 7.27658  | 0.01982-16.70282 | 1.17524 | 0.01346-188.4456 | 3.8599  | 0-5.396196  | 0.027429 |
| Lung squamous cell carcinoma                                              | LUSC    | 491  | 0.00493-63.42261  | 0.30612 | 0.0205-334.7  | 9.1669   | 0.009719-9.77187 | 0.37767 | 0.01157-57.75582 | 1.90166 | 0-7.798091  | 0.025797 |
| Mesothelioma                                                              | MESO    | 36   | 0.06606-60.38315  | 1.62307 | 0.2933-111.31 | 13.5762  | 0.01459-0.96429  | 0.27614 | 0.152-164.118    | 6.874   | 0.005836-10 | 0.053438 |
| Ovarian serous cystadenocarcinoma                                         | OV      | 262  | 0.00806-105.93238 | 0.59627 | 0-88.94866    | 0.53444  | 0.02216-37.34842 | 0.58062 | 0.00316-97.35991 | 1.41155 | 0-14.429923 | 0.030044 |
| Pancreatic adenocarcinoma                                                 | PAAD    | 124  | 0.00823-22.29949  | 1.31975 | 0.0206-585.91 | 59.4444  | 0.2756-38.8793   | 2.7401  | 0.04545-95.91668 | 16.3085 | 0-40.7250   | 2.5696   |
| Pheochromocytoma and Paraganglioma                                        | PCPG    | 179  | 0.03319-185.48998 | 3.15909 | 0-3.40893     | 0.04715  | 0.1517-109.6754  | 1.8048  | 0.001364-13.1092 | 0.21298 | 0-101.43900 | 0.72137  |
| Prostate adenocarcinoma                                                   | PRAD    | 418  | 0.002882-28.63309 | 6.188   | 0.00609-42.2  | 2.69929  | 0.1588-23.4055   | 1.1456  | 0.01153-67.65765 | 4.00541 | 0-1.528662  | 0.020559 |
| Rectum adenocarcinoma                                                     | READ    | 91   | 0.002732-8.786259 | 0.07849 | 0.00207-77.5  | 1.28553  | 0.07074-10.66667 | 0.64735 | 0.00432-60.91293 | 1.66942 | 0-0.471074  | 0.003766 |
| Sarcoma                                                                   | SARC    | 212  | 0.00211-246.92765 | 2.6637  | 0-727.7104    | 3.6773   | 0.01463-102.4301 | 0.38471 | 0.0019-566.4545  | 2.6268  | 0-44.7471   | 0        |
| Skin cutaneous melanoma                                                   | SKCM    | 82   | 0.0063-356.1323   | 3.2244  | 0.06109-22.21 | 2.14157  | 0-30.15196       | 0.20497 | 0.00365-5.60924  | 0.11118 | 0-0.8298510 | 0.01015  |
| Stomach adenocarcinoma                                                    | STAD    | 529  | 0.1994-14.429726  | 0.13515 | 0.00271-254.1 | 5.76262  | 0.0184-12.3715   | 0.8426  | 0.00111-44.40830 | 3.57855 | 0-12.93622  | 0.06636  |
| Thyroid carcinoma                                                         | THCA    | 498  | 0-395.5872        | 0.3103  | 0-227.0570    | 1.326    | 0.01075-22.47112 | 1.03453 | 0-69.3800        | 0.625   | 0-3.590908  | 0.001555 |
| Uterine corpus endometrial carcinoma                                      | UCEC    | 370  | 0.00851-37.36764  | 1.85028 | 0-117.78238   | 0.3563   | 0.01702-65.94483 | 0.81482 | 0.00546-242.2872 | 2.6518  | 0-15.753458 | 0.022858 |
| Uterine carcinosarcoma                                                    | UCS     | 57   | 0.08728-54.74269  | 6.88796 | 0.05937-56.7  | 4.13761  | 0.05993-11.55522 | 1.31512 | 0.01839-27.57355 | 0.66182 | 0-2.06684   | 0.1076   |
